# Supplementary material
Source: publisher site journal article supplement (https://www.dovepress.com/article/256647)
Supplement: Supplementary file 1 [file get_supplementary_file.php]

**Supplementary Table S1** Spearman’s correlation between clinical parameters and clinical assessments (Spearman’s rho is shown)

|  | Age | Sex | Married | Education years | Current employment | Psychiatric history | Currently treatment of psychiatry | Family history of psychiatric treatment | Drinking | Smoking |
| --- | --- | --- | --- | --- | --- | --- | --- | --- | --- | --- |
| PHQ-9 | -0.05 | 0.15* | -0.21** | -0.11 | 0.05 | 0.23** | 0.18** | 0.03 | -0.11 | 0.01 |
| *Cyclothymic* | -0.22** | 0.07 | -0.24** | -0.03 | 0.01 | 0.18** | 0.12 | 0.05 | -0.03 | 0.07 |
| *Depressive* | -0.16* | 0.06 | -0.17** | -0.07 | 0.02 | 0.14 | 0.07 | 0.06 | -0.06 | 0.09 |
| *Irritable* | -0.11 | -0.08 | -0.04 | 0.04 | 0.00 | 0.13 | 0.10 | 0.03 | 0.06 | 0.09 |
| *Hyperthymic* | -0.07 | -0.14 | 0.04 | 0.14 | 0.00 | 0.01 | 0.07 | -0.02 | 0.13 | 0.11 |
| *Anxious* | 0.05 | 0.14 | -0.01 | -0.09 | -0.02 | 0.09 | 0.05 | -0.05 | -0.06 | 0.03 |
| COBRA | 0.06 | 0.13 | -0.09 | -0.08 | -0.02 | 0.16* | 0.17** | 0.07 | -0.02 | -0.03 |
| SDS work | -0.02 | 0.06 | -0.18** | -0.08 | 0.08 | 0.17** | 0.16* | 0.05 | -0.06 | 0.01 |
| SDS social | -0.02 | 0.09 | -0.19** | -0.07 | 0.06 | 0.17** | 0.19** | 0.06 | -0.05 | -0.06 |
| SDS family/home | 0.12 | 0.12 | 0.00 | -0.17** | 0.06 | 0.17** | 0.10 | 0.06 | -0.10 | -0.05 |
| SDS total | 0.00 | 0.09 | -0.17** | -0.10 | 0.09 | 0.20** | 0.17** | 0.07 | -0.08 | -0.03 |

Abbreviations: *Anxious*, anxious temperament; COBRA, cognitive complaints in bipolar disorder rating assessment; *Cyclothymic*, cyclothymic temperament; *Depressive*, depressive temperament; *Hyperthymic*, hyperthymic temperament; *Irritable*, irritable temperament; PHQ-9, Patient Health Questionnaire-9; SDS, Sheehan Disability Scale.

**p* < 0.05, ***p* < 0.01 (Two-sided and significance level of Bonferroni adjustment).
